# Supplementary material for: Anodic Stripping Voltammetry with the Hanging Mercury Drop Electrode for Trace Metal Detection in Soil Samples
Source: MDPI journal article supplement (doi:10.3390/chemosensors9050107), 2021-05-13
Supplement: s1 [file s1]

Supporting information for:

# Anodic Stripping Voltammetry with the Hanging Mercury Drop Electrode for Trace Metal Detection in Soils Samples

Kequan Xu, Clara Pérez-Ràfols, Amine Marchoud, María Cuartero\*, and Gastón A. Crespo\*

<sup>1</sup> Department of Chemistry, School of Engineering Science in Chemistry, Biotechnology and Health, KTH Royal Institute of Technology, Teknikringen 30, SE-100 44, Stockholm, Sweden

\* Correspondence: mariacb@kth.se; gacp@kth.se

**Table S1.** Comparison of analytical parameters between different electrodes.

| Electrode                                       | Repeatability                                                                                            | Reproducibility                                                                                          | LOD                                                                                                                      | Ref |
|-------------------------------------------------|----------------------------------------------------------------------------------------------------------|----------------------------------------------------------------------------------------------------------|--------------------------------------------------------------------------------------------------------------------------|-----|
| PdNPs – PACs modified GCE                       | NS                                                                                                       | NS                                                                                                       | Cd <sup>2+</sup> : 41 nM<br>Pb <sup>2+</sup> : 50 nM<br>Cu <sup>2+</sup> : 66 nM<br>Hg <sup>2+</sup> : 54 nM             | [1] |
| AuNPs modified GCE                              | 5%-15%                                                                                                   | NS                                                                                                       | Cd <sup>2+</sup> : 300 nM<br>Pb <sup>2+</sup> : 300 nM<br>Cu <sup>2+</sup> : 300 nM<br>Hg <sup>2+</sup> : 300 nM         | [2] |
| GCE                                             | NS                                                                                                       | Zn <sup>2+</sup> is not reproducible at pH >4                                                            | Zn <sup>2+</sup> : 0.225 µM<br>Cd <sup>2+</sup> : 0.085 µM<br>Pb <sup>2+</sup> : 0.080 µM<br>Cu <sup>2+</sup> : 0.614 µM | [3] |
| Amino acid modified GCE                         | < 2%                                                                                                     | < 5%                                                                                                     | Zn <sup>2+</sup> : 8.92 pM<br>Cd <sup>2+</sup> : 5.77 pM<br>Cu <sup>2+</sup> : 3.01 pM<br>Hg <sup>2+</sup> : 5.89 pM     | [4] |
| GA-MOF modified GCE                             | Cd <sup>2+</sup> : 6.9%<br>Pb <sup>2+</sup> : 2.9%<br>Cu <sup>2+</sup> : 4.8%<br>Hg <sup>2+</sup> : 0.8% | NS                                                                                                       | Cd <sup>2+</sup> : 9 nM<br>Pb <sup>2+</sup> : 1 nM<br>Cu <sup>2+</sup> : 8 nM<br>Hg <sup>2+</sup> : 0.9 nM               | [5] |
| SnO <sub>2</sub> /rGO modified GCE              | NS                                                                                                       | NS                                                                                                       | Cd <sup>2+</sup> : 0.102 nM<br>Pb <sup>2+</sup> : 0.184 nM<br>Cu <sup>2+</sup> : 0.227 nM<br>Hg <sup>2+</sup> : 0.279 nM | [6] |
| IL dopped with Mg(II)/Al(III) LDHs modified GCE | Cd <sup>2+</sup> : 4.1%<br>Pb <sup>2+</sup> : 2.5%<br>Cu <sup>2+</sup> : 3.6%<br>Hg <sup>2+</sup> : 4.6% | Cd <sup>2+</sup> : 4.7%<br>Pb <sup>2+</sup> : 4.5%<br>Cu <sup>2+</sup> : 3.8%<br>Hg <sup>2+</sup> : 5.6% | Cd <sup>2+</sup> : 2.230 nM<br>Pb <sup>2+</sup> : 0.077 nM<br>Cu <sup>2+</sup> : 0.394 nM<br>Hg <sup>2+</sup> : 1.246 nM | [7] |
| Stainless steel                                 | Cd <sup>2+</sup> : 5.14%<br>Pb <sup>2+</sup> : 3.15%                                                     | NS                                                                                                       | Cd <sup>2+</sup> : 230 nM<br>Pb <sup>2+</sup> : 33 nM                                                                    | [8] |

|                                        |                                                                                                              |                                                                                                          |                                                                                                                                  |      |
|----------------------------------------|--------------------------------------------------------------------------------------------------------------|----------------------------------------------------------------------------------------------------------|----------------------------------------------------------------------------------------------------------------------------------|------|
|                                        | Cu <sup>2+</sup> : 2.56%<br>Hg <sup>2+</sup> : 2.47%                                                         |                                                                                                          | Cu <sup>2+</sup> : 7.3 nM<br>Hg <sup>2+</sup> : 28 nM                                                                            |      |
| rGO/SnO <sub>2</sub> /PPy modified GCE | NS                                                                                                           | NS                                                                                                       | Cd <sup>2+</sup> : 0.75 pM<br>Pb <sup>2+</sup> : 0.83 pM<br>Cu <sup>2+</sup> : 0.83 pM<br>Hg <sup>2+</sup> : 0.81 pM             | [9]  |
| P1,2-DAAQ modified GCE                 | Pb <sup>2+</sup> : 2.31%<br>Hg <sup>2+</sup> : 3.71%<br>Cu <sup>2+</sup> : 9.69%<br>Cd <sup>2+</sup> : 2.76% | NS                                                                                                       | Cd <sup>2+</sup> : 2.67 nM<br>Pb <sup>2+</sup> : 2.8 nM<br>Cu <sup>2+</sup> : 30.6 nM<br>Hg <sup>2+</sup> : 1.3 nM               | [10] |
| Metallophthalocyanine modified GCE     | No observable peak position and height                                                                       | No observable peak position and height                                                                   | Cd <sup>2+</sup> : 347.06 nM<br>Pb <sup>2+</sup> : 55.87 nM<br>Cu <sup>2+</sup> : 327.71 nM<br>Hg <sup>2+</sup> : 81.94 nM       | [11] |
| FGO modified GCE                       | NS                                                                                                           | NS                                                                                                       | Cd <sup>2+</sup> : 10 nM <sup>a</sup><br>Pb <sup>2+</sup> : 10 nM <sup>a</sup><br>Cu <sup>2+</sup> : NS<br>Hg <sup>2+</sup> : NS | [12] |
| AgNps/rGO modified magnetic GCE        | 1.902%                                                                                                       | NS                                                                                                       | Cd <sup>2+</sup> : 0.245 μM<br>Pb <sup>2+</sup> : 0.287 μM<br>Cu <sup>2+</sup> : 0.171 μM<br>Hg <sup>2+</sup> : 0.180 μM         | [13] |
| rGO/NiWO <sub>4</sub> modified CPE     | < 4%                                                                                                         | < 4%                                                                                                     | Cd <sup>2+</sup> : 0.10 nM<br>Pb <sup>2+</sup> : 0.18 nM<br>Cu <sup>2+</sup> : 0.23 nM<br>Hg <sup>2+</sup> : 0.28 nM             | [14] |
| HAP-Nafion modified GCE                | NS                                                                                                           | Cd <sup>2+</sup> : 5.9%<br>Pb <sup>2+</sup> : 4.8%<br>Cu <sup>2+</sup> : 3.1%<br>Hg <sup>2+</sup> : 6.1% | Cd <sup>2+</sup> : 35 nM<br>Pb <sup>2+</sup> : 49 nM<br>Cu <sup>2+</sup> : 21 nM<br>Hg <sup>2+</sup> : 30 nM                     | [15] |
| GO/CeO <sub>2</sub> modified GCE       | NS                                                                                                           | NS                                                                                                       | Cd <sup>2+</sup> : 0.194 nM<br>Pb <sup>2+</sup> : 0.106 nM<br>Cu <sup>2+</sup> : 0.164 nM<br>Hg <sup>2+</sup> : 0.277 nM         | [16] |
| Cys/rGO modified GCE                   | NS                                                                                                           | NS                                                                                                       | Cd <sup>2+</sup> : 3.26 nM<br>Pb <sup>2+</sup> : 2.01 nM<br>Cu <sup>2+</sup> : 4.11 nM<br>Hg <sup>2+</sup> : 5.55 nM             | [17] |

<sup>a</sup>LOD calculated for the individual determination of each metal

AuNPs: gold nanoparticles; CPE: carbon paste electrode; Cys: cysteine; FGO: Fluorinated graphene oxide; GA: graphene aerogel; GCE: glassy carbon electrode; GO: graphene oxide; HAP: hydroxyapatite; IL: ionic liquid LDH: layered double hydroxide; MOF: metal–organic framework; P1,2-DAAQ: poly(1,2-diaminoanthraquinone); PACs: porous activated carbon; PdNPs: Palladium nanoparticles; PPy: polypyrrole; rGO: reduced graphene oxide; individual refers to no simultaneous results can be obtained from the original paper

**Table S2.** Metal concentration values determined by ASV and ICP-AES in soil samples.

| Sample | Zn <sup>2+</sup> |                      |                   | Pb <sup>2+</sup> |                      |                   | Cd <sup>2+</sup> |                      |                   |
|--------|------------------|----------------------|-------------------|------------------|----------------------|-------------------|------------------|----------------------|-------------------|
|        | ASV<br>(ppm)     | ICP-<br>AES<br>(ppm) | Difference<br>(%) | ASV<br>(ppm)     | ICP-<br>AES<br>(ppm) | Difference<br>(%) | ASV<br>(ppm)     | ICP-<br>AES<br>(ppm) | Difference<br>(%) |
| 1      | 7.90             | 8.24                 | 4.09              | 4.33             | 4.30                 | 0.60              | 4.57             | 4.73                 | 3.35              |
| 2      | 5.30             | 5.28                 | 0.44              | 2.38             | 2.35                 | 1.45              | 1.51             | 1.59                 | 4.94              |
| 3      | 21.79            | 31.66                | 31.17             | 22.64            | 23.78                | 4.79              | 7.73             | 8.20                 | 5.79              |
| 4      | 20.32            | 18.99                | 7.00              | 15.00            | 14.27                | 5.10              | 5.25             | 4.92                 | 6.62              |
| 5      | 13.33            | 12.74                | 4.64              | 18.29            | 17.15                | 6.63              | 16.09            | 14.64                | 9.89              |
| 6      | 12.79            | 13.51                | 5.32              | 14.85            | 16.26                | 8.63              | 5.59             | 6.10                 | 8.33              |
| 7      | 104.36           | 128.0                | 18.47             | 46.31            | 45.10                | 2.68              | 17.43            | 16.79                | 3.82              |
| 8      | 80.01            | 55.28                | 44.75             | 48.64            | 36.69                | 32.58             | 49.69            | 36.22                | 37.19             |
| 9      | 116.90           | 107.5                | 8.74              | 10.28            | 7.81                 | 31.73             | 4.06             | 3.81                 | 6.66              |
| S0     | 11.04            | 10.84                | 1.86              | 7.34             | 6.99                 | 5.09              | 5.66             | 5.48                 | 3.32              |
| 11     | 14.80            | 12.33                | 20.03             | 6.98             | 6.43                 | 8.55              | 4.09             | 3.80                 | 7.58              |
| 12     | 9.57             | 9.48                 | 0.90              | 5.79             | 5.67                 | 2.09              | 5.37             | 4.97                 | 8.12              |
| 13     | 17.23            | 8.22                 | 109.64            | 6.20             | 4.16                 | 49.10             | 2.96             | 2.58                 | 14.77             |
| 14     | 35.94            | 36.18                | 0.67              | 66.77            | 69.53                | 3.97              | 70.29            | 66.42                | 5.83              |
| 15     | 126.61           | 122.6                | 3.3.              | 15.93            | 13.96                | 14.08             | 6.24             | 4.63                 | 34.80             |
| 16     | 19.52            | 21.13                | 7.65              | 24.97            | 27.23                | 8.33              | 7.68             | 8.18                 | 6.12              |
| 17     | 23.35            | 24.47                | 4.57              | 18.83            | 18.81                | 0.07              | 8.79             | 9.52                 | 7.70              |
| 18     | 26.01            | 25.96                | 0.20              | 19.94            | 20.02                | 0.37              | 13.06            | 13.49                | 3.18              |
| 19     | 15.14            | 13.97                | 8.36              | 0.35             | 9.73                 | 6.43              | 9.13             | 9.01                 | 1.35              |

## References

1. Veerakumar, P.; Veeramani, V.; Chen, S.-M.; Madhu, R.; Liu, S.-B. Palladium nanoparticle incorporated porous activated carbon: electrochemical detection of toxic metal ions. *ACS applied materials & interfaces* **2016**, *8*, 1319-1326.
2. Xu, X.; Duan, G.; Li, Y.; Liu, G.; Wang, J.; Zhang, H.; Dai, Z.; Cai, W. Fabrication of gold nanoparticles by laser ablation in liquid and their application for simultaneous electrochemical detection of Cd<sup>2+</sup>, Pb<sup>2+</sup>, Cu<sup>2+</sup>, Hg<sup>2+</sup>. *ACS applied materials & interfaces* **2014**, *6*, 65-71.
3. Van Staden, J.; Matoetoe, M. Simultaneous determination of copper, lead, cadmium and zinc using differential pulse anodic stripping voltammetry in a flow system. *Analytica Chimica Acta* **2000**, *411*, 201-207.
4. Kokab, T.; Shah, A.; Iftikhar, F.J.; Nisar, J.; Akhter, M.S.; Khan, S.B. Amino acid-fabricated glassy carbon electrode for efficient simultaneous sensing of zinc (II), cadmium (II), copper (II), and mercury (II) ions. *ACS omega* **2019**, *4*, 22057-22068.
5. Lu, M.; Deng, Y.; Luo, Y.; Lv, J.; Li, T.; Xu, J.; Chen, S.-W.; Wang, J. Graphene aerogel-metal-organic framework-based electrochemical method for simultaneous detection of multiple heavy-metal ions. *Analytical chemistry* **2018**, *91*, 888-895.
6. Wei, Y.; Gao, C.; Meng, F.-L.; Li, H.-H.; Wang, L.; Liu, J.-H.; Huang, X.-J. SnO<sub>2</sub>/reduced graphene oxide nanocomposite for the simultaneous electrochemical detection of cadmium (II), lead (II), copper (II), and mercury (II): an interesting favorable mutual interference. *The journal of physical chemistry C* **2012**, *116*, 1034-1041.
7. Zhou, J.; Sun, G.; Pan, J.; Pan, Y.; Wang, S.; Zhai, H. A nanocomposite consisting of ionic liquid-functionalized layered Mg (II)/Al (III) double hydroxides for simultaneous electrochemical determination of cadmium (II), copper (II), mercury (II) and lead (II). *Microchimica Acta* **2019**, *186*, 1-7.
8. Kitte, S.A.; Li, S.; Nsabimana, A.; Gao, W.; Lai, J.; Liu, Z.; Xu, G. Stainless steel electrode for simultaneous stripping analysis of Cd (II), Pb (II), Cu (II) and Hg (II). *Talanta* **2019**, *191*, 485-490.
9. Rehman, A.U.; Ikram, M.; Kan, K.; Zhao, Y.; Zhang, W.J.; Zhang, J.; Liu, Y.; Wang, Y.; Du, L.; Shi, K. 3D interlayer nanohybrids composed of reduced graphenescheme oxide/SnO<sub>2</sub>/PPy grown from expanded graphite for the detection of ultra-trace Cd<sup>2+</sup>, Cu<sup>2+</sup>, Hg<sup>2+</sup> and Pb<sup>2+</sup> ions. *Sensors and Actuators B: Chemical* **2018**, *274*, 285-295.
10. Hassan, K.M.; Gaber, S.E.; Altahan, M.F.; Azzem, M.A. Novel Sensor Based on Poly (1, 2-Diaminoanthraquinone) for Individual and Simultaneous Anodic Stripping Voltammetry of Cd<sup>2+</sup>, Pb<sup>2+</sup>, Cu<sup>2+</sup> and Hg<sup>2+</sup>. *Electroanalysis* **2018**, *30*, 1155-1162.
11. Fomo, G.; Nwaji, N.; Nyokong, T. Low symmetric metallophthalocyanine modified electrode via click chemistry for simultaneous detection of heavy metals. *Journal of Electroanalytical Chemistry* **2018**, *813*, 58-66.
12. Thiruppathi, A.R.; Sidhureddy, B.; Keeler, W.; Chen, A. Facile one-pot synthesis of fluorinated graphene oxide for electrochemical sensing of heavy metal ions. *Electrochemistry Communications* **2017**, *76*, 42-46.
13. Sang, S.; Li, D.; Zhang, H.; Sun, Y.; Jian, A.; Zhang, Q.; Zhang, W. Facile synthesis of AgNPs on reduced graphene oxide for highly sensitive simultaneous detection of heavy metal ions. *RSC advances* **2017**, *7*, 21618-21624.
14. Kumar, R.; Bhuvana, T.; Sharma, A. Nickel tungstate-graphene nanocomposite for simultaneous electrochemical detection of heavy metal ions with application to complex aqueous media. *RSC advances* **2017**, *7*, 42146-42158.
15. Gao, F.; Gao, N.; Nishitani, A.; Tanaka, H. Rod-like hydroxyapatite and Nafion nanocomposite as an electrochemical matrix for simultaneous and sensitive detection of Hg<sup>2+</sup>, Cu<sup>2+</sup>, Pb<sup>2+</sup> and Cd<sup>2+</sup>. *Journal of Electroanalytical Chemistry* **2016**, *775*, 212-218.
16. Xie, Y.-L.; Zhao, S.-Q.; Ye, H.-L.; Yuan, J.; Song, P.; Hu, S.-Q. Graphene/CeO<sub>2</sub> hybrid materials for the simultaneous electrochemical detection of cadmium (II), lead (II), copper (II), and mercury (II). *Journal of Electroanalytical Chemistry* **2015**, *757*, 235-242.
17. Muralikrishna, S.; Sureshkumar, K.; Varley, T.S.; Nagaraju, D.H.; Ramakrishnappa, T. In situ reduction and functionalization of graphene oxide with L-cysteine for simultaneous electrochemical determination of cadmium (II), lead (II), copper (II), and mercury (II) ions. *Analytical Methods* **2014**, *6*, 8698-8705.
